# Supplementary material
Source: PubMed Central journal article supplement (PMC3691785)
Supplement: supp_WNL.0b013e318288792b_Fig_e-1_and_table_e-1.pdf [file supp_WNL.0b013e318288792b_Fig_e-1_and_table_e-1.pdf]

Figure e-1.

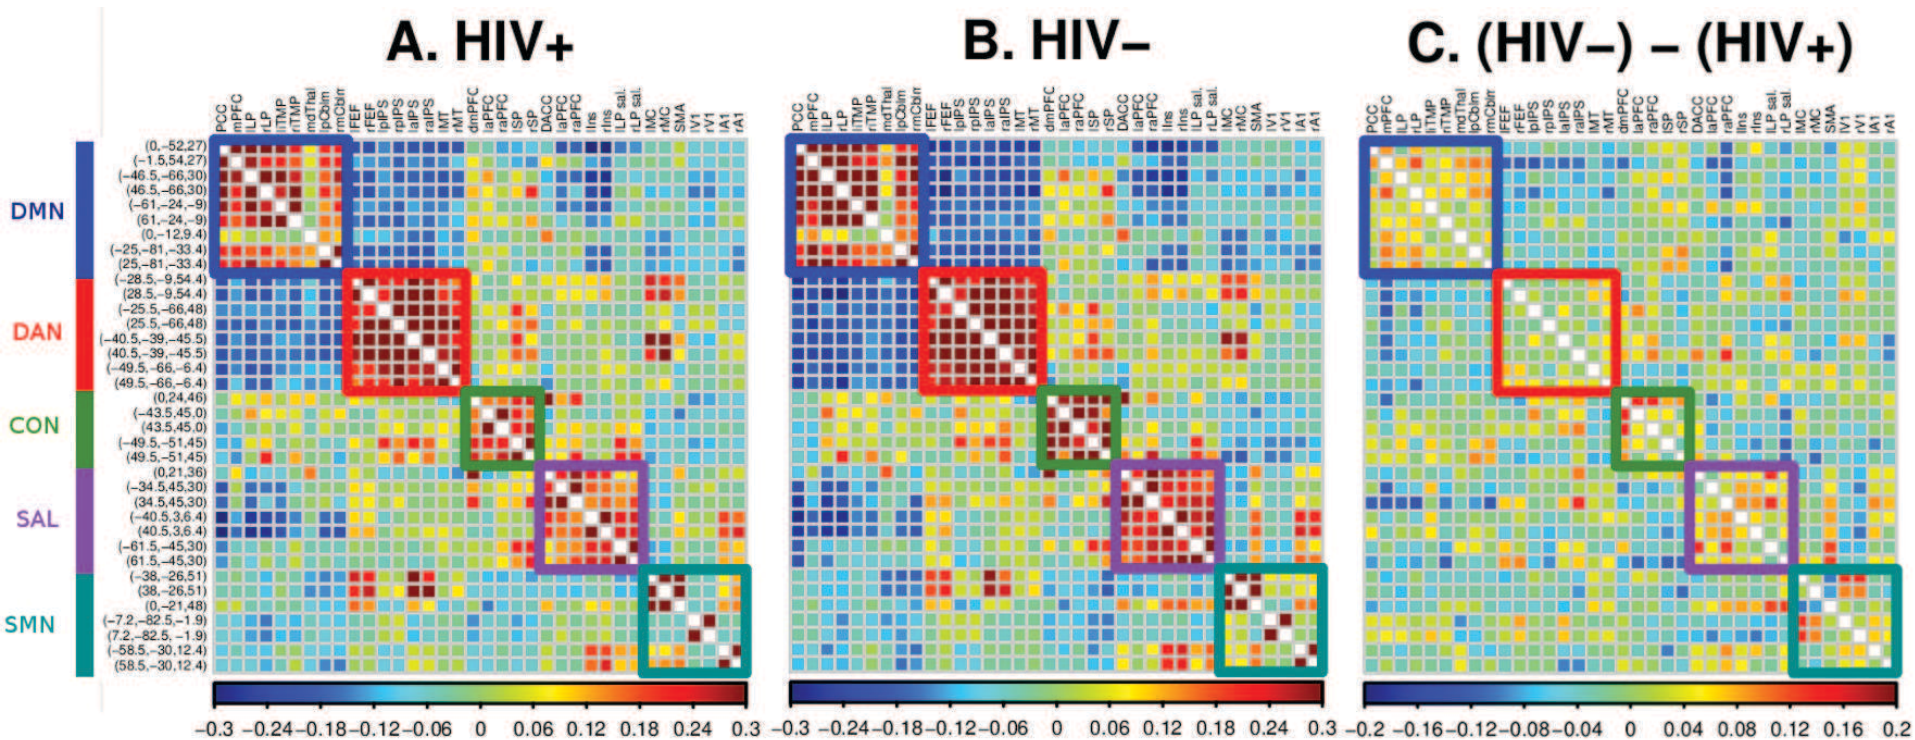

Figure e-1: [Title: Whole-brain correlation-matrix analysis] Functional correlation matrices for 36 canonical regions covering five major networks (blue: default mode network (DMN), red: dorsal attention network (DAN), green: executive-control (CON), purple: salience (SAL), and turquoise: sensory motor network (SMN) for a) HIV-, b) HIV+, and c) difference of HIV- and HIV+ subjects. Decreases in resting state functional connections were seen primarily in intra-network correlations which are situated along the diagonal and demarcated by boxes indicating specific network membership. Certain inter-network correlations (arrayed on the off-diagonal) were also seen to be affected by HIV.

**Table e-1: Changes in HIV-affected rs-fcMRI networks with respect to clinical, laboratory and neuropsychological markers of HIV (N=52)**

| Intra-network composites          |         |         | Inter-network composites          |         |         |
|-----------------------------------|---------|---------|-----------------------------------|---------|---------|
| DMN Composite                     | F(4,47) | p-value | DMN-DAN Composite                 | F(4,47) | p-value |
| HIV Log VL                        | 0.64    | 0.43    | HIV Log VL                        | 0.40    | 0.53    |
| CD4+ Count                        | 0.02    | 0.89    | CD4+ Count                        | 1.76    | 0.19    |
| Degree of impairment <sup>1</sup> | 0.26    | 0.62    | Degree of impairment <sup>1</sup> | 0.10    | 0.75    |
| Presence of HAART <sup>2</sup>    | 0.01    | 0.93    | Presence of HAART <sup>2</sup>    | 0.04    | 0.84    |
| Substance <sup>3</sup>            | 1.72    | 0.20    | Substance <sup>3</sup>            | 2.60    | 0.11    |
| CON Composite                     | F(4,47) | p-value | CON-SMN Composite                 | F(4,47) | p-value |
| HIV Log VL                        | 0.39    | 0.53    | HIV Log VL                        | 0.19    | 0.67    |
| CD4+ Count                        | 0.01    | 0.94    | CD4+ Count                        | 0.14    | 0.71    |
| Degree of impairment <sup>1</sup> | 2.64    | 0.11    | Degree of impairment <sup>1</sup> | 0.47    | 0.50    |
| Presence of HAART <sup>2</sup>    | 0.06    | 0.82    | Presence of HAART <sup>2</sup>    | 0.97    | 0.33    |
| Substance <sup>3</sup>            | 0.12    | 0.73    | Substance <sup>3</sup>            | 1.40    | 0.24    |
| SAL Composite                     | F(4,47) | p-value | CON-SAL Composite                 | F(4,47) | p-value |
| HIV Log VL                        | 0.05    | 0.83    | HIV Log VL                        | 2.62    | 0.11    |
| CD4+ Count                        | 1.56    | 0.22    | CD4+ Count                        | 1.67    | 0.20    |
| Degree of impairment <sup>1</sup> | 0.07    | 0.79    | Degree of impairment <sup>1</sup> | 1.05    | 0.31    |
| Presence of HAART <sup>2</sup>    | 0.03    | 0.87    | Presence of HAART <sup>2</sup>    | 0.92    | 0.34    |
| Substance <sup>3</sup>            | 0.71    | 0.40    | Substance <sup>3</sup>            | 0.33    | 0.57    |
|                                   |         |         | DAN-SAL Composite                 | F(4,47) | p-value |
|                                   |         |         | HIV Log VL                        | 0.34    | 0.57    |
|                                   |         |         | CD4+ Count                        | 0.13    | 0.72    |
|                                   |         |         | Degree of impairment <sup>1</sup> | 0.12    | 0.73    |
|                                   |         |         | Presence of HAART <sup>2</sup>    | 0.04    | 0.85    |
|                                   |         |         | Substance <sup>3</sup>            | 0.36    | 0.55    |

<sup>1</sup> Impaired N=12; Unimpaired N=40

<sup>2</sup> HAART+ N=23; HAART- N=29

<sup>3</sup> Substance+ N=13; Substance-N=35

No effects of neuropsychological or laboratory measures on rs-fcMRI were observed
