# Supplementary material
Source: PubMed Central journal article supplement (PMC3691785)
Supplement: supp_WNL.0b013e318288792b_Pathways_to_neurodegeneration.pdf [file supp_WNL.0b013e318288792b_Pathways_to_neurodegeneration.pdf]

## Pathways to neurodegeneration: Effects of HIV and aging on resting-state functional connectivity

سُبل إلى التنكس العصبي: تأثير فيروس نقص المناعة البشرية والشيخوخة في الوظيفية التوصيلية بحالة الراحة

**الهدف:** قد يقدم مرنان الوظيفية التوصيلية بحالة الراحة (rs-fcMRI) فكرة عن الفيزيولوجيا العصبية لفيروس HIV (فيروس نقص المناعة البشرية) والتقدم بالعمر (الشيخوخة).

**الطرق:** في هذه الدراسة ذات المقطع المستعرض، استعملنا مرنان الوظيفية التوصيلية بحالة الراحة (rs-fcMRI) لاستقصاء التوصيلية داخل الشبكات وما بين الشبكات (عبر 5 شبكات وظيفية للدماغ) لدى 58 مصاباً بفيروس نقص المناعة البشرية (HIV +) (44٪ منهم كانوا يتلقون علاجاً فعالاً للغاية بمضادات الفيروسات القهقرية) و53 مشاركاً غير مصابين بفيروس الأيدز (HIV -) كشواهد (ضوابط). تحليل التباين والتغاير قيم العلاقة ما بين العمر، العلامات المخبرية لفيروس HIV ودرجة الإعاقة الإدراكية وبين شبكات الدماغ.

**النتائج:** الأفراد الذين كانوا (HIV +) كان لديهم انخفاض في الترابط داخل الشبكات في مرنان الوظيفية التوصيلية بحالة الراحة (rs-fcMRI) وذلك في: شبكة الوضع الافتراضي (DMN,  $p = 0.01$ )، شبكة التحكم (CON,  $p = 0.02$ ) وشبكة البروز (SAL,  $p = 0.02$ )، ولكن لم يظهر أي تغيير في شبكة الحسي الحركي (SMN) أو شبكة الانتباه الظهري (DAN).

بالمقارنة مع مجموعة الشواهد (HIV -)، فإن مجموعة (HIV +) كان لديها: نقص هام في الترابط ما بين شبكتي DMN-DAN ( $p = 0.02$ )، ميل للنقص في الترابط ما بين شبكتي DMN-SAL ( $p = 0.1$ ) وشبكتي CON-SMN ( $p = 0.1$ ) وميل للزيادة في الترابط ما بين شبكتي CON-SAL ( $p = 0.1$ ).

لا العلامات المخبرية لفيروس نقص المناعة البشرية HIV (عيار الحمل الفيروسي لفيروس HIV في البلازما أو تعداد CD4 +) ولا درجة الإعاقة الإدراكية ارتبطت بأي قياس في rs-fcMRI. أما التقدم بالعمر فارتبط مع انخفاض في كمية الوظيفية التوصيلية داخل الشبكات في كل من شبكة DMN ( $p = 0.04$ ) وشبكة SAL ( $p = 0.006$ ) وانخفاض كمية الوظيفية التوصيلية ما بين الشبكات ما بين شبكتي

DMN و SAL ( $p = 0.009$ ) وذلك عند كلا مجموعتي المشاركين HIV+ و HIV-. لم يلاحظ أي تأثير متبادل ما بين فيروس نقص المناعة البشرية HIV والتقدم بالعمر.

**الاستنتاجات:** قد يسبب كل من فيروس HIV والتقدم بالعمر بشكل مستقل انخفاضاً في مرنان الوظيفة التوصيلية بحالة الراحة (rs-fcMRI). قد يؤدي فيروس HIV إلى انخفاض خط الأساس في وظيفة الدماغ بشكل مشابه للتدهور الذي يحدث مع التقدم بالعمر.

---

**OBJECTIVE:** Resting-state functional connectivity MRI (rs-fcMRI) may provide insight into the neurophysiology of HIV and aging.

**METHODS:** In this cross-sectional study, we used rs-fcMRI to investigate intra- and internetwork connectivity among 5 functional brain networks in 58 HIV-infected (HIV+) participants (44% receiving highly active antiretroviral therapy) and 53 HIV-uninfected (HIV-) controls. An analysis of covariance assessed the relationship among age, HIV laboratory markers, or degree of cognitive impairment and brain networks.

**RESULTS:** Individuals who were HIV+ had decreased rs-fcMRI intranetwork correlations in the default mode (DMN,  $p = 0.01$ ), control (CON,  $p = 0.02$ ), and salience (SAL,  $p = 0.02$ ) networks, but showed no changes in the sensorimotor (SMN) or dorsal attention (DAN) network. Compared with HIV- controls, participants who were HIV+ had a significant loss of internetwork correlations between the DMN-DAN ( $p = 0.02$ ), trending loss in DMN-SAL ( $p = 0.1$ ) and CON-SMN ( $p = 0.1$ ), and trending increase in CON-SAL ( $p = 0.1$ ). Neither HIV markers (plasma HIV viral load or CD4(+) cell count) nor degree of cognitive impairment correlated with rs-fcMRI measures. Aging correlated with a decrease in the magnitude of intranetwork functional connectivity within the DMN ( $p = 0.04$ ) and SAL ( $p = 0.006$ ) and with decreased magnitude of internetwork functional connectivity between DMN and SAL ( $p = 0.009$ ) for both HIV+ and HIV- participants. No interaction was observed between HIV and aging.

**CONCLUSIONS:** HIV and aging may cause independent decreases in rs-fcMRI. HIV may lead to a baseline decrease in brain function similar to deterioration that occurs with aging.

---

**Translator: Ahmad Al-Awwad MD, Damascus University, Damascus, Syria**

**Translation Reviewer: Nora Almuslim MD, University of Dammam, Neurology Department, Khobar, Kingdom of Saudi Arabia**
